# Supplementary material
Source: PubMed Central journal article supplement (PMC10140182)
Supplement: NIHMS1889907-supplement-supplement.pdf [file NIHMS1889907-supplement-supplement.pdf]

## Supplementary Appendix

Supplement to: Luetkemeyer AF, Donnell D, Dombrowski JC, et al. Postexposure doxycycline to prevent bacterial sexually transmitted infections. *Engl J Med* 2023;388:1296-306. DOI: 10.1056/NEJMoa2211934

This appendix has been provided by the authors to give readers additional information about the work.

Supplementary Appendix to Manuscript Entitled  
**Doxycycline to prevent bacterial sexually transmitted infections**

**Table of Contents**

|                                                                                                                                                          |    |
|----------------------------------------------------------------------------------------------------------------------------------------------------------|----|
| DoxyPEP Team and Additional Acknowledgments .....                                                                                                        | 2  |
| Supplemental Analyses:.....                                                                                                                              | 4  |
| Per protocol analyses .....                                                                                                                              | 4  |
| Recurrent and multiple STIs .....                                                                                                                        | 4  |
| Figure 1. Primary endpoint of one or more STI per quarter by individual STI .....                                                                        | 5  |
| Figure 2. Anatomic distribution of incident STIs.....                                                                                                    | 6  |
| Table 1. Proportion of culture-positivity and tetracycline antimicrobial resistance in participants diagnosed with <i>N. gonorrhoeae</i> infection ..... | 7  |
| Table 2. Proportion of culture-positivity and doxycycline resistance in <i>S. aureus</i> isolates from baseline and follow-up by arm.....                | 8  |
| Table 3. Laboratory monitoring of CBC and liver function tests .....                                                                                     | 9  |
| Table 4. Adverse Events .....                                                                                                                            | 9  |
| Table 5. Symptoms reported at quarterly visits.....                                                                                                      | 10 |
| Table 6. Baseline characteristics of study participants living with HIV .....                                                                            | 10 |
| Table 7. Representativeness of the participant sample .....                                                                                              | 12 |
| Supplement References.....                                                                                                                               | 13 |

## **DoxyPEP Team and Additional Acknowledgments**

### DoxyPEP Data Team

Deborah Donnell, Cole Grabow, Kathy Thomas, Eric Vittinghoff

## **SAN FRANCISCO**

### San Francisco City Clinic, San Francisco Department of Public Health

Stephanie Cohen (Co-investigator, Site PI), Melody Nassar, Nikolas Alves da Costa e Silva, D. Cimmityotti, Alison Cohee, Elizabeth Faber, Sally Grant, Yvonne Piper

### Zuckerberg San Francisco General

Annie Luetkemeyer (Co- PI), Carolina Lopez, Emma Bainbridge  
Doug Black, Kat Christopoulos, Jay Dwyer, Diane Havlir, Cecilia Rivas Alfaro, Jaime Velasco  
Veronica Viar

### San Francisco Department of Public Health

Susan Buchbinder, Kenneth Coleman, Godfred Masinde, Trang Nguyen, Madeline Sankaran,  
Hyman Scott, Janie Vinson

### Zuckerberg San Francisco General Clinical Lab

Barb Haller, Mary Allen Eugenio, Phong Pham

### UCSF Hair Lab

Monica Gandhi, Hideaki Okochi

### Chan-Zuckerberg BioHub

Chaz Langelier, Yanedth Sanchez Guerrero

### Core Immunology Lab

Christina Gonzaga and all of the CIL staff.

## **SEATTLE**

### Madison Clinic Harborview Medical Center

Connie Celum (Co-PI), Rodney Perkins, Clare Brown, Sheila Dunaway, Deborah Donnell, Rob  
Fredericksen, Lindsay Legg, Sharon Martens, Jia Wong

### Sexual Health Clinic, Public Health Seattle- King County

Julie Dombrowski (Co-investigator, Site PI), Cheryl Malinski, Rafael Padilla

### UW Microbiology

Olusegun Soge

### UW ICRC

Elena Rechkina, Marie Bauer, Daphne Hamilton, Matthew Ikuma, Jin Kim

### Seattle DPH

Christina Thibault

### Additional Acknowledgments

Jared Baeten, Ruanne Barnabas, Elizabeth Barash, Rachel Bender-Ignacio, Jade Boyer, Chase Cannon, Sheila Dunaway, John Friend, Matt Golden, Harald Haugen, Ellie Hawman, Susannah Herrmann, Matt Hickey, Mary-Lawrence Hicks, Edward 'Jake' Jacobs, Rachel Johnson, Colleen Kimsey, Savannah Lawton, Julia Mathis, Mari Metter, Jean-Michel Molina, Brandi Moretz, Negusse Ocbamichael, Michael Peluso, Meena Ramchandani, Luis Reyes-Umana, Selorm Tamakloe, Sundos Yassin

## Supplemental Analyses:

### Per protocol analyses

Two per protocol analyses were conducted.

- 1) Per protocol analysis excluding those with doxycycline discontinuation.

In a prespecified analysis, for each cohort the doxycycline PEP arm was restricted to study time prior to the first discontinuation of study drug by self-report or documented on the study CRFs. A discontinuation was defined as a clinician-directed product hold or a participant-reported cessation of doxycycline usage lasting for more than a week. Doxycycline PEP was temporarily held during STI treatment with doxycycline (e.g., for *Chlamydia trachomatis* diagnosis) and was not considered as a discontinuation. In an analysis limited to participants who did not have doxycycline discontinued (1233 quarters, 467 participants: 320 doxy-PEP, 148 SOC), the relative reduction of incident STI's per quarter with doxy-PEP was 0.32 (95%CI 0.23, 0.44) per quarter in the PrEP cohort and 0.37 (95%CI:0.23, 0.59) in the PLWH cohort.

- 2) Per protocol analyses by self- reported adherence

In an analysis limited to participants who reported always taking doxycycline after sex (1002 quarters, 413 participants: 265 doxy-PEP, 148 SOC) the relative reduction of incident STI's per quarter with doxy-PEP was 0.26 (95%CI 0.18, 0.38) per quarter in the PrEP cohort and 0.32 (95%CI: 0.19, 0.54) in the PLWH cohort.

### Recurrent and multiple STIs

Among SOC participants, 37.3% (77/206) had at least one quarter with  $\geq 1$  STIs diagnosed, and 21.4% (44/206) were diagnosed with STIs in more than one quarter. Of SOC participants who had a primary STI endpoint, 20% (24/121) had multiple STIs diagnosed during the quarter with a primary endpoint. In the doxy-PEP arm, 18.8% (81/431) had at least one quarter with  $\geq 1$  STIs diagnosed, and 3.7% (16/431) had STIs diagnosed in more than one quarter. Among those assigned to doxy-PEP who had a primary STI endpoint, 6.2% (6/97) had more than one STI diagnosed during the quarter with a primary endpoint.

**Figure 1.** Primary endpoint of one or more STI per quarter by individual STI  
*Note:* Randomization was 2:1 doxy-PEP vs. SOC. There was a significant reduction in STI incidence with doxyPEP despite a similar number of endpoints in the doxy-PEP and SOC arms

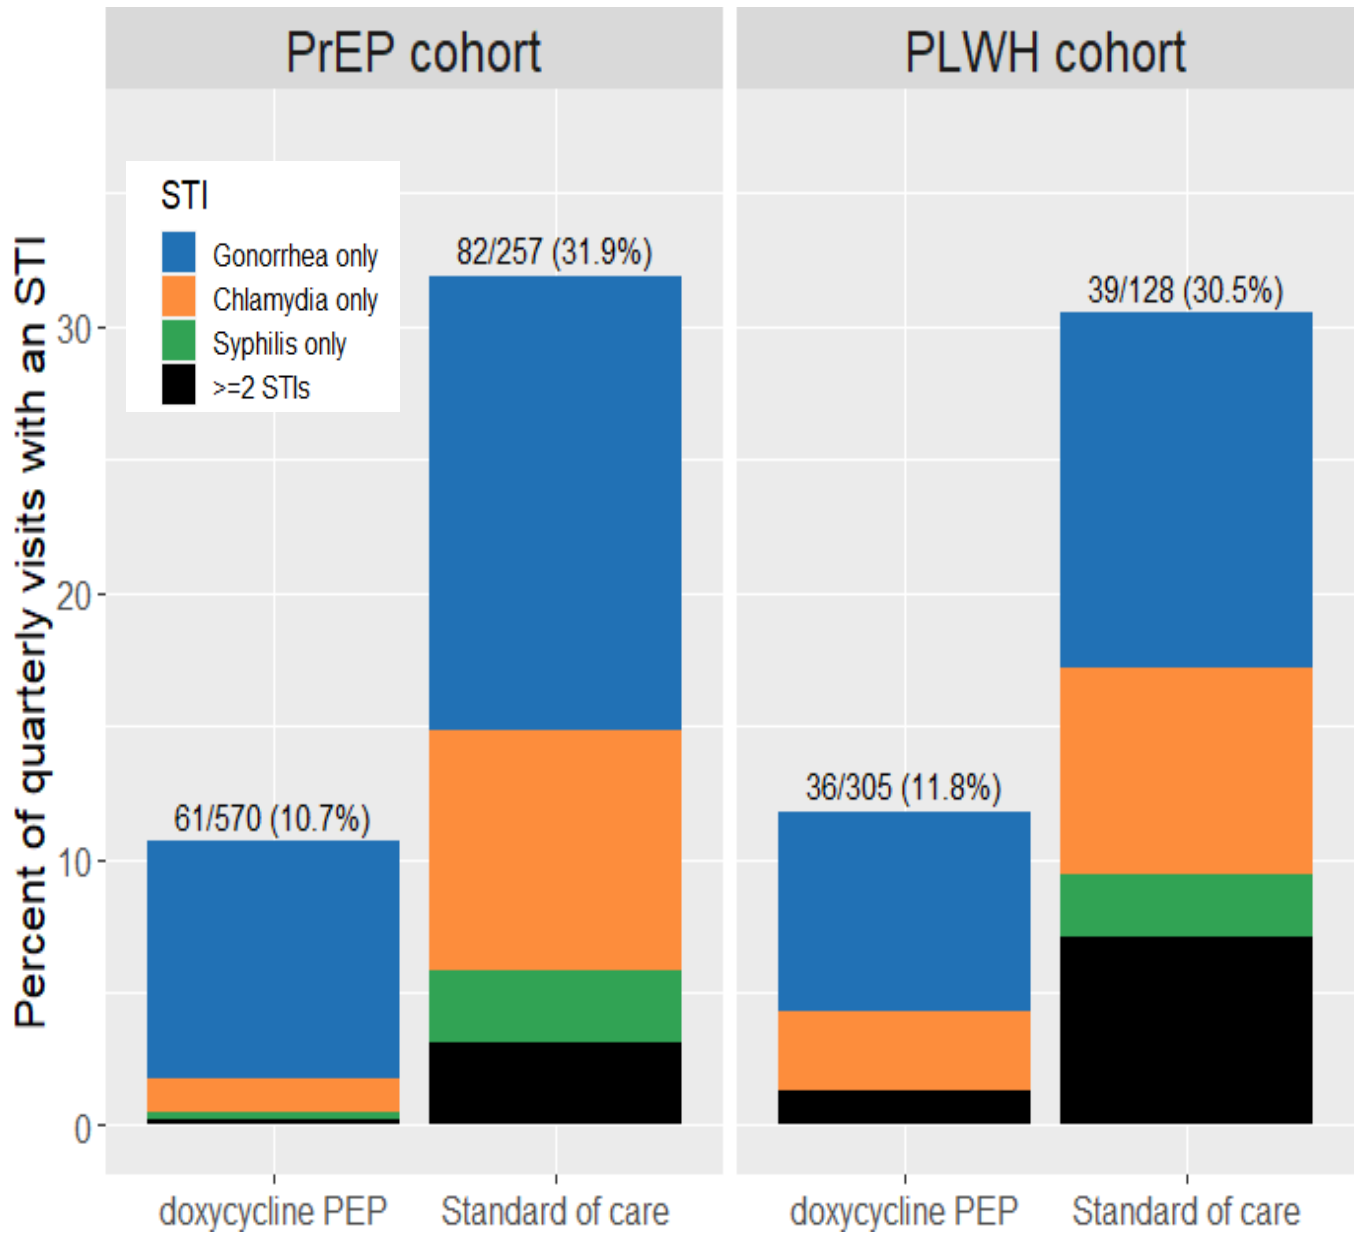

**Figure 2.** Anatomic distribution of incident STIs.

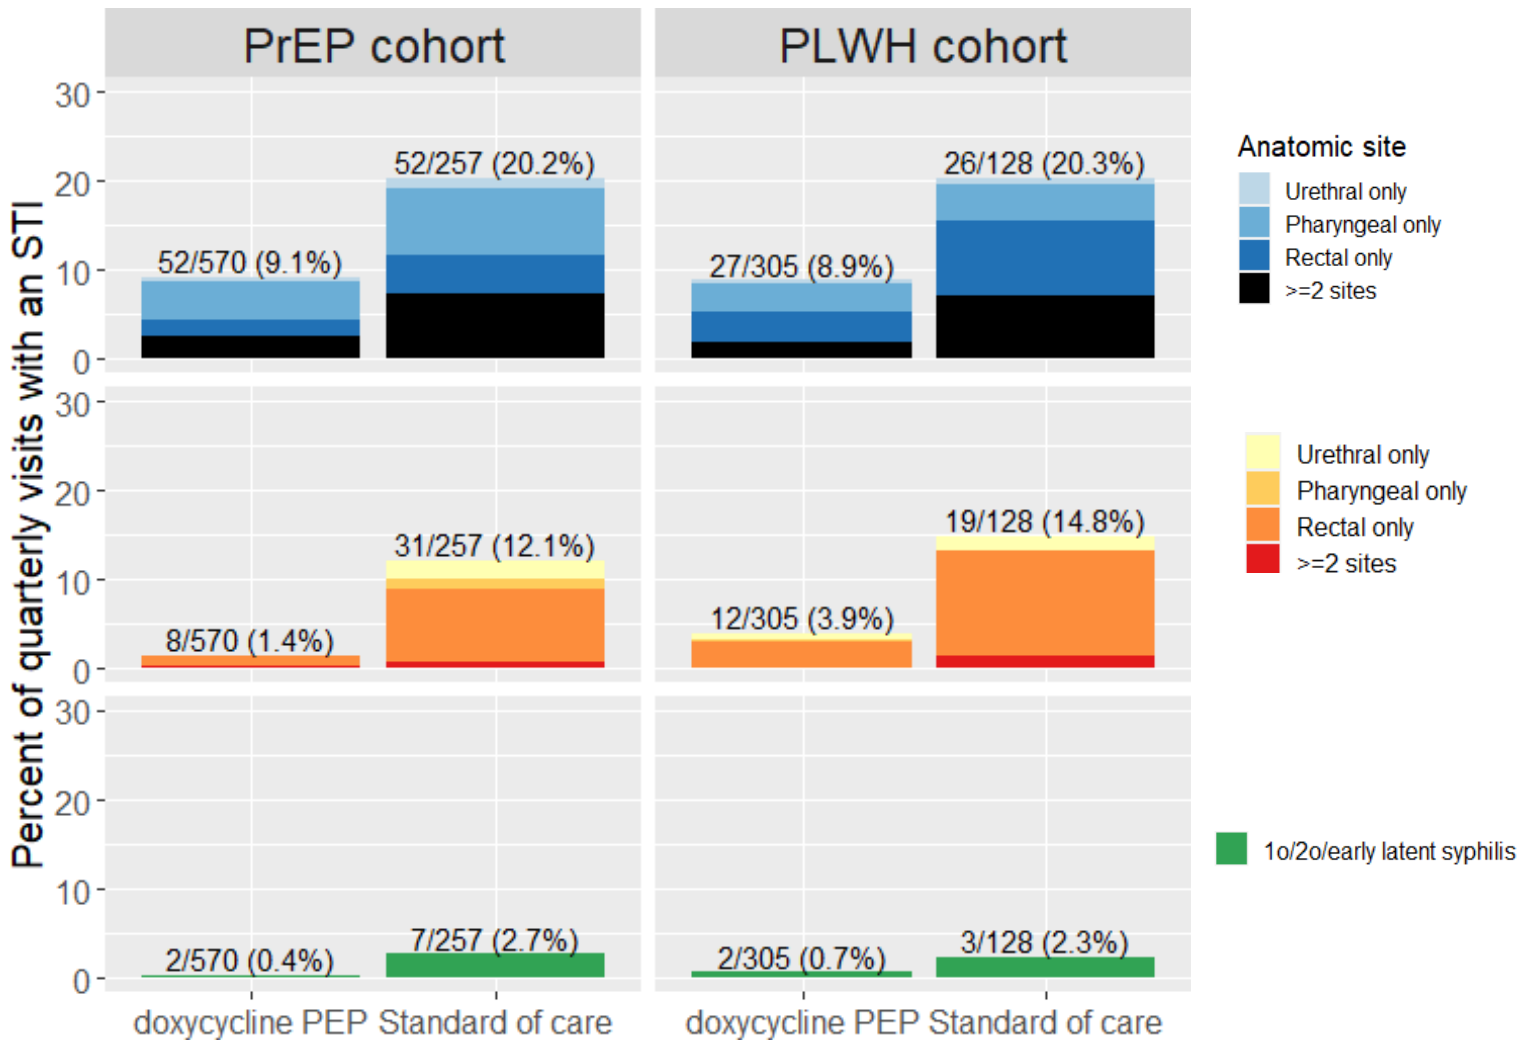

**Table 1.** Proportion of culture-positivity and tetracycline antimicrobial resistance in participants diagnosed with *N. gonorrhoeae* infection

|                 |                                               | PrEP         |              | PLWH         |              | Total        |              |
|-----------------|-----------------------------------------------|--------------|--------------|--------------|--------------|--------------|--------------|
|                 |                                               | Doxy PEP     | SOC          | Doxy PEP     | SOC          | Doxy PEP     | SOC          |
| <b>Baseline</b> | GC infections                                 | 40           | 20           | 25           | 14           | 65           | 34           |
|                 | GC cultures with resistance testing available | 5            | 4            | 2            | 4            | 7            | 8            |
|                 | Tetracycline-resistant                        | 2<br>(40.0%) | 1<br>(25.0%) | 0 (0%)       | 1<br>(25.0%) | 2<br>(28.6%) | 2<br>(25.0%) |
| <b>On Study</b> | GC infections                                 | 52           | 52           | 27           | 26           | 79           | 78           |
|                 | GC cultures with resistance testing available | 7            | 10           | 6            | 6            | 13           | 16           |
|                 | Tetracycline-resistant                        | 3<br>(42.9%) | 1<br>(10.0%) | 2<br>(33.3%) | 1<br>(16.7%) | 5<br>(38.5%) | 2<br>(12.5%) |



**Table 2.** Proportion of culture-positivity and doxycycline resistance in *S. aureus* isolates from baseline and follow-up by arm

|                 |                         | PrEP       |           | PLWH      |           | Total      |            |
|-----------------|-------------------------|------------|-----------|-----------|-----------|------------|------------|
|                 |                         | Doxy PEP   | SOC       | Doxy PEP  | SOC       | Doxy PEP   | SOC        |
| <b>Baseline</b> | Total samples           | 209        | 104       | 117       | 53        | 326        | 157        |
|                 | <i>S. aureus</i> growth | 83         | 46        | 56        | 30        | 139        | 76         |
|                 | Doxycycline-resistant   | 8 (9.6%)   | 7 (15.2%) | 4 (7.1%)  | 6 (20%)   | 12 (8.6%)  | 13 (17.1%) |
|                 | MSSA <sup>1</sup>       | 73         | 43        | 45        | 24        | 118        | 67         |
|                 | Doxycycline-resistant   | 7 (9.6%)   | 7 (16.3%) | 4 (8.9%)  | 2 (8.3%)  | 11 (9.3%)  | 9 (13.4%)  |
|                 | MRSA <sup>2</sup>       | 9          | 3         | 11        | 6         | 20         | 9          |
|                 | Doxycycline-resistant   | 1 (11.1%)  | 0 (0%)    | 0 (0%)    | 4 (66.7%) | 1 (5.0%)   | 4 (44.4%)  |
| <b>Month 6</b>  | Total samples           | 122        | 47        | 70        | 28        | 192        | 75         |
|                 | <i>S. aureus</i> growth | 34         | 16        | 17        | 13        | 51         | 29         |
|                 | Doxycycline-resistant   | 10 (29.4%) | 1 (6.3%)  | 1 (5.9%)  | 2 (15.4%) | 11 (21.6%) | 3 (10.3%)  |
|                 | MSSA                    | 30         | 15        | 12        | 11        | 42         | 26         |
|                 | Doxycycline-resistant   | 9 (30.0%)  | 1 (6.7%)  | 1 (8.3%)  | 1 (9.1%)  | 10 (23.8%) | 2 (7.7%)   |
|                 | MRSA                    | 4          | 1         | 5         | 2         | 9          | 3          |
|                 | Doxycycline-resistant   | 1 (25.0%)  | 0 (0%)    | 0 (0%)    | 1 (50.0%) | 1 (11.1%)  | 1 (33.3%)  |
| <b>Month 12</b> | Total samples           | 74         | 37        | 37        | 14        | 111        | 51         |
|                 | <i>S. aureus</i> growth | 21         | 17        | 10        | 7         | 31         | 24         |
|                 | Doxycycline-resistant   | 4 (19.0%)  | 1 (5.9%)  | 1 (10.0%) | 1 (14.3%) | 5 (16.1%)  | 2 (8.3%)   |
|                 | MSSA                    | 20         | 15        | 9         | 6         | 29         | 21         |
|                 | Doxycycline-resistant   | 4 (20.0%)  | 1 (6.7%)  | 1 (11.1%) | 0 (0%)    | 5 (17.2%)  | 1 (4.8%)   |
|                 | MRSA                    | 1          | 2         | 1         | 1         | 2          | 3          |
|                 | Doxycycline-resistant   | 0 (0%)     | 0 (0%)    | 0 (0%)    | 1 (100%)  | 0 (0%)     | 1 (33.3%)  |

<sup>1</sup> MSSA: Methicillin sensitive *S. aureus*

<sup>2</sup> MRSA: Methicillin resistant *S. aureus*

**Table 3.** Laboratory monitoring of CBC and liver function tests

|                                                    | Doxy-PEP <sup>1</sup> |                  | Standard of care               |
|----------------------------------------------------|-----------------------|------------------|--------------------------------|
|                                                    | Month 3               | Month 9          | First observation <sup>2</sup> |
| <b>Laboratory results</b><br>(median [IQR])        | 308                   | 198              | 74                             |
| Complete blood count                               |                       |                  |                                |
| Total leukocyte count (x10 <sup>9</sup> /L)        | 5.8 (4.94–6.97)       | 6.01 (5.09–6.9)  | 5.94 (5.03–7)                  |
| Absolute neutrophil count<br>(x10 <sup>9</sup> /L) | 3.14 (2.52–3.87)      | 3.14 (2.52–3.91) | 3.08 (2.38–4.01)               |
| Total hemoglobin (g/dL)                            | 15.1 (14.4–15.7)      | 15 (14.4–15.6)   | 15.3 (14.4–16)                 |
| Platelet count (x10 <sup>9</sup> /L)               | 253.5 (220–295)       | 255 (217–286)    | 250 (222–297)                  |
| Liver function tests                               |                       |                  |                                |
| Total bilirubin (mg/dL)                            | 0.6 (0.5–0.8)         | 0.6 (0.4–0.7)    | 0.6 (0.6–1.5)                  |
| AST (SGOT) (IU/L)                                  | 24 (20–29)            | 25 (21–30)       | 23 (19–24)                     |
| ALT (SGPT) (IU/L)                                  | 24 (19–31)            | 25 (19–32)       | 24 (18–33)                     |
| Alkaline phosphatase (IU/L)                        | 69 (57–81)            | 70 (58.5–84)     | 63 (56–78)                     |

- 1 CBCs and LFTs were scheduled to be done at month 3 and month 9 visit for participants in the doxy-PEP arm; if a participant missed that visit, CBCs and LFTs were scheduled to be made up at month 6 and month 12 visits, respectively. Make-up samples are included in month 3 and 9 scheduled collection here.
- 2 CBCs were scheduled to be done at least once during follow-up. If testing was done more than once, only the first sample was used in this analysis. LFTs were not conducted as part of DoxyPEP for participants in the standard of care arm; if LFTs were reported as part of standard of care they are included here (N = 7).

**Table 4.** Adverse Events

| Reporting criteria                               | Event                                                  | Determination of relationship |
|--------------------------------------------------|--------------------------------------------------------|-------------------------------|
| Grade ≥ 2 lab abnormality related to doxycycline | Elevated ALT ( <i>Grade 2</i> )                        | Possible                      |
| Grade ≥ 3 adverse event related to doxycycline   | Diarrhea ( <i>Grade 3</i> )                            | Probable                      |
|                                                  | Diarrhea ( <i>Grade 3</i> )                            | Possible                      |
|                                                  | Diarrhea ( <i>Grade 3</i> )                            | Possible                      |
|                                                  | Headache/migraine ( <i>Grade 3</i> )                   | Possible                      |
|                                                  | Headache/migraine ( <i>Grade 3</i> )                   | Possible                      |
| Serious adverse event                            | Cat bite (req. hospitalization)                        | Unrelated                     |
|                                                  | Testicular torsion (req. surgery)                      | Unrelated                     |
|                                                  | Hypotension 2o to substance use (req. hospitalization) | Unrelated                     |
|                                                  | Gastroenteritis (req. hospitalization)                 | N/A (not in doxy-PEP arm)     |

**Table 5. Symptoms reported at quarterly visits**

|                               | Doxy-PEP                                      |                                                                                     | Standard of Care                              |
|-------------------------------|-----------------------------------------------|-------------------------------------------------------------------------------------|-----------------------------------------------|
|                               | Proportion of quarters with symptoms reported | Proportion of quarters with symptoms reported & attributed to doxy-PEP by clinician | Proportion of quarters with symptoms reported |
| <b>Skin rash</b>              | 57/928 (6.1%)                                 | 5/928 (0.5%)                                                                        | 23/402 (5.7%)                                 |
| <b>More readily sunburned</b> | 39/928 (4.2%)                                 | 21/928 (2.3%)                                                                       | 4/402 (1.0%)                                  |
| <b>Headache</b>               | 76/928 (8.2%)                                 | 1/928 (0.1%)                                                                        | 37/402 (9.2%)                                 |
| <b>Changes in vision</b>      | 22/928 (2.4%)                                 | 1/928 (0.1%)                                                                        | 10/402 (2.5%)                                 |
| <b>Pain with swallowing</b>   | 20/928 (2.2%)                                 | 0/928 (0.0%)                                                                        | 13/402 (3.2%)                                 |
| <b>Difficulty swallowing</b>  | 13/928 (1.4%)                                 | 1/928 (0.1%)                                                                        | 11/402 (2.7%)                                 |
| <b>Diarrhea</b>               | 112/928 (12.1%)                               | 26/928 (2.8%)                                                                       | 37/402 (9.2%)                                 |
| <b>Nausea</b>                 | 62/928 (6.7%)                                 | 14/928 (1.5%)                                                                       | 13/402 (3.2%)                                 |
| <b>Vomiting</b>               | 23/928 (2.5%)                                 | 3/928 (0.3%)                                                                        | 12/402 (3.0%)                                 |
| <b>Abdominal pain</b>         | 38/928 (4.1%)                                 | 2/928 (0.2%)                                                                        | 15/402 (3.7%)                                 |
| <b>Other</b>                  | 57/928 (6.1%)                                 | 1/928 (0.1%)                                                                        | 30/402 (7.5%)                                 |

**Table 6. Baseline characteristics of study participants living with HIV**

| Baseline characteristics of PLWH                             | N=174           |
|--------------------------------------------------------------|-----------------|
| N (%) with documented ART usage                              | 173 (99.4%)     |
| Median (IQR) CD4 <sup>+</sup> count (cells/mm <sup>3</sup> ) | 697.5 (499–880) |
| N (%) with HIV viral load ≤ 50                               | 158 (94.6%)     |
| Median (IQR) viral load among viremic participants (N=9)     | 1354 (145–7123) |

|                                                              | N=174           |
|--------------------------------------------------------------|-----------------|
| N (%) with documented ART usage                              | 173 (99.4%)     |
| Median (IQR) CD4 <sup>+</sup> count (cells/mm <sup>3</sup> ) | 698 (499–880)   |
| N (%) with HIV viral load ≤ 50                               | 158 (94.6%)     |
| Median (IQR) viral load among viremic participants (N=9)     | 1354 (145–7123) |



**Table 7. Representativeness of the participant sample**

| Category                                          | Example                                                                                                                                                                                                                                                                                                                                                                                                                                                                                                                                                                                                                                                                                                                                     |
|---------------------------------------------------|---------------------------------------------------------------------------------------------------------------------------------------------------------------------------------------------------------------------------------------------------------------------------------------------------------------------------------------------------------------------------------------------------------------------------------------------------------------------------------------------------------------------------------------------------------------------------------------------------------------------------------------------------------------------------------------------------------------------------------------------|
| Disease, problem or condition under investigation | Bacterial sexually transmitted infections (STIs) in men who have sex with men (MSM)                                                                                                                                                                                                                                                                                                                                                                                                                                                                                                                                                                                                                                                         |
| Special Considerations related to:                |                                                                                                                                                                                                                                                                                                                                                                                                                                                                                                                                                                                                                                                                                                                                             |
| Sex & Gender                                      | STIs disproportionately impact men who have sex with men[1], with a marked impact on those who are living with HIV[2, 3] or who are taking HIV PrEP[4, 5]. In the US, the plurality of new syphilis diagnosis are in MSM (46%). Chlamydia is more common in women than men, whereas gonorrhea is more common in men than women. However, in people accessing STI clinics, MSM were more commonly diagnosed with chlamydia and gonorrhea than women or men who have sex with women.                                                                                                                                                                                                                                                          |
| Race or ethnic group                              | Some racial and ethnic groups are more impacted by STIs. In 2021 CDC data[1], non-Hispanic Black/African Americans had the highest case rates of chlamydia and gonorrhea, compared to other racial and ethnic groups, and syphilis was most common in American Indian/Alaska Native and Black/African-Americans.                                                                                                                                                                                                                                                                                                                                                                                                                            |
| Geography                                         | The STI epidemic is global[6], with a disproportionate impact described in MSM in the US[1], Australia[7] and Western Europe[8].                                                                                                                                                                                                                                                                                                                                                                                                                                                                                                                                                                                                            |
| Other considerations                              |                                                                                                                                                                                                                                                                                                                                                                                                                                                                                                                                                                                                                                                                                                                                             |
| Overall representativeness of this trial          | This study enrolled 8% Black, 11% Asian/Pacific Islander, 15% multiple races/other, and 65% White. 30% of participants identified as Hispanic/Latinx. The proportion of black participants were slightly lower than current US population distribution[9], whereas Latinx enrollment exceeded current US Latinx population percentages. Overall, the study enrolled a diverse population that is representative of the US population. Transgender women/gender diverse participant were 4% of the study, an insufficient proportion to draw conclusions about doxy-PEP efficacy in this population. The study enrolled in Seattle and San Francisco, two urban US West Coast cities, thus do not have data from other geographic locations. |

## Supplement References

1. CDC. *Sexually Transmitted Disease Surveillance 2020*. 2022; Available from: <https://www.cdc.gov/std/statistics/2020/default.htm>.
2. Secco, A.A., et al., *Sexually transmitted infections in persons living with HIV infection and estimated HIV transmission risk: trends over time from the DC Cohort*. *Sex Transm Infect*, 2020. **96**(2): p. 89-95.
3. Kalichman, S.C., J. Pellowski, and C. Turner, *Prevalence of sexually transmitted co-infections in people living with HIV/AIDS: systematic review with implications for using HIV treatments for prevention*. *Sex Transm Infect*, 2011. **87**(3): p. 183-90.
4. Traeger, M.W., et al., *Association of HIV Preexposure Prophylaxis With Incidence of Sexually Transmitted Infections Among Individuals at High Risk of HIV Infection*. *Jama*, 2019. **321**(14): p. 1380-1390.
5. Ong, J.J., et al., *Global Epidemiologic Characteristics of Sexually Transmitted Infections Among Individuals Using Preexposure Prophylaxis for the Prevention of HIV Infection: A Systematic Review and Meta-analysis*. *JAMA Network Open*, 2019. **2**(12): p. e1917134-e1917134.
6. Zheng, Y., et al., *Global burden and trends of sexually transmitted infections from 1990 to 2019: an observational trend study*. *Lancet Infect Dis*, 2022. **22**(4): p. 541-551.
7. Thng, C.C.M., *A Review of Sexually Transmitted Infections in Australia - Considerations in 2018*. *Acad Forensic Pathol*, 2018. **8**(4): p. 938-946.
8. Geretti, A.M., et al., *Sexual transmission of infections across Europe: appraising the present, scoping the future*. *Sexually Transmitted Infections*, 2022. **98**(6): p. 451-457.
9. Bureau, U.C., *United States Census Quick Facts*. 2020.
